# Supplementary material for: Long-term antibacterial performances of biodegradable polylactic acid materials with direct absorption of antibiotic agents
Source: Royal Society of Chemistry journal article supplement (doi:10.1039/c8ra00504d), 2018-01-01
Supplement: c8ra00504d1.pdf [file c8ra00504d1.pdf]

## Electronic Supporting Information

# Long-term Antibacterial Performances of the Biodegradable Polylactic Acid Materials with Directly Absorption of Antibiotic Agents

**Chien-Hao Chen<sup>a,b</sup>, Yuan-Yuan Yao<sup>c</sup>, Hao-Che Tang<sup>a,b</sup>, Tung-Yi Lin<sup>a,b</sup>, Dave W. Chen<sup>a,b\*</sup>, Kong-Wei Cheng<sup>a,c,\*</sup>**

<sup>a</sup> *Department of Orthopaedic Surgery, Chang Gung Memorial Hospital, Keelung Branch, Taoyuan, Taiwan*

<sup>b</sup> *College of Medicine, Chang Gung University, Taoyuan, Taiwan*

<sup>c</sup> *Department of Chemical and Materials Engineering, Chang Gung University, Taoyuan, Taiwan*

*\*Corresponding author*

*Dave W. Chen: Address: Department of Orthopaedic Surgery, Chang Gung Memorial Hospital, Keelung Branch, Taoyuan, Taiwan*

*E-mail: [mr5181@adm.cgmh.org.tw](mailto:mr5181@adm.cgmh.org.tw)*

*K.W Cheng: Address: 259 Wen-Hwa 1<sup>st</sup> Rd., Kwei-Shan, Taoyuan 333, Taiwan*

*E-mail : [kwcheng@mail.cgu.edu.tw](mailto:kwcheng@mail.cgu.edu.tw)*

*Tel.: +886-3-2118800-3353; Fax: +886-3-2118668*

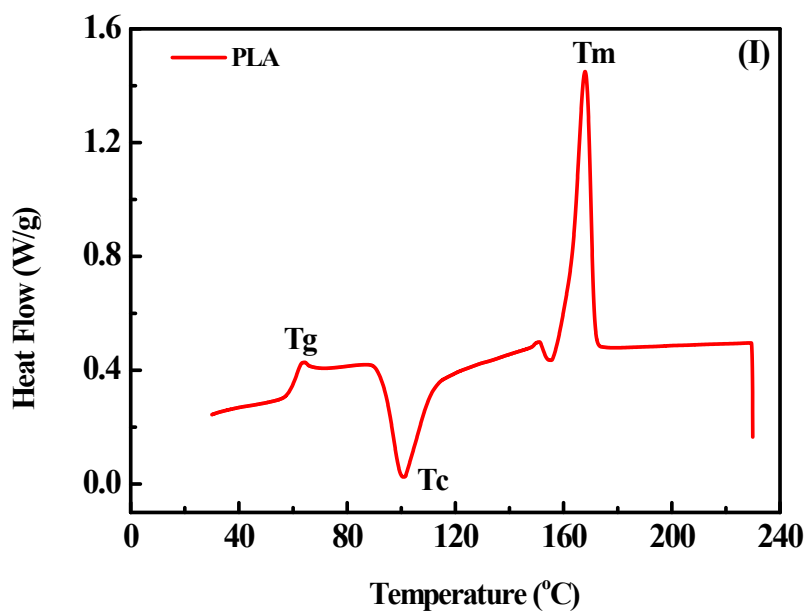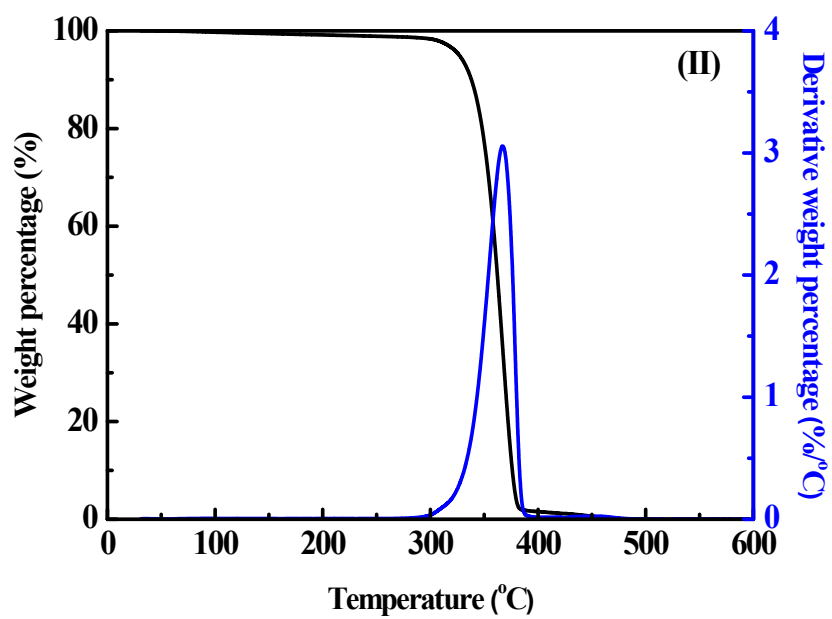

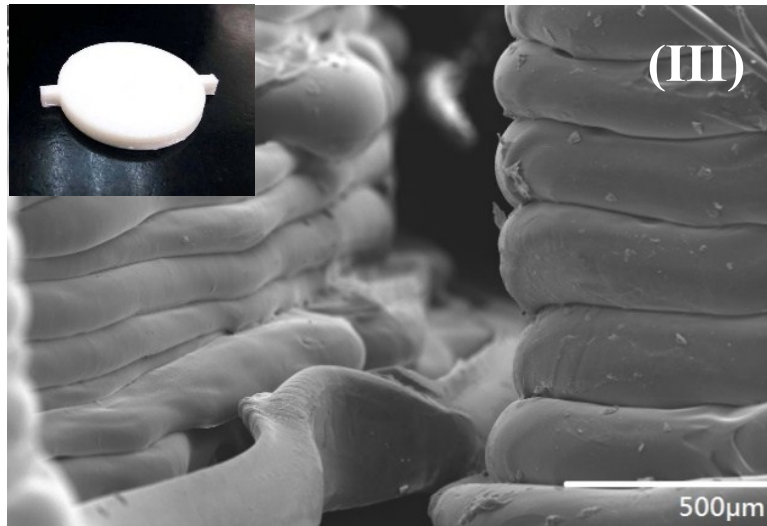

Figure S1 (I) DSC, (II) TGA and (III) SEM results of PLA materials used for the 3D printing

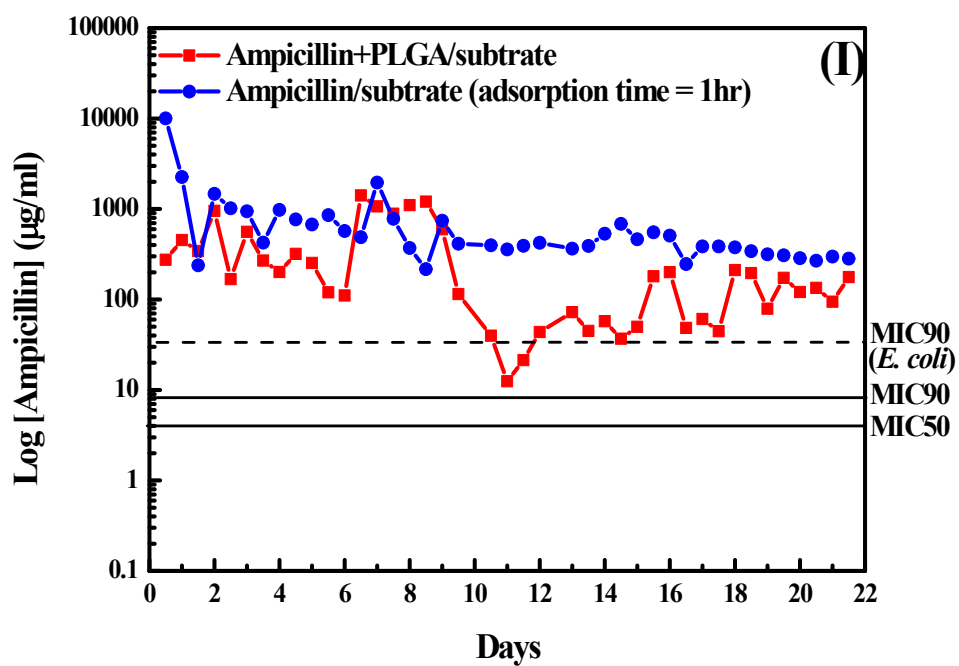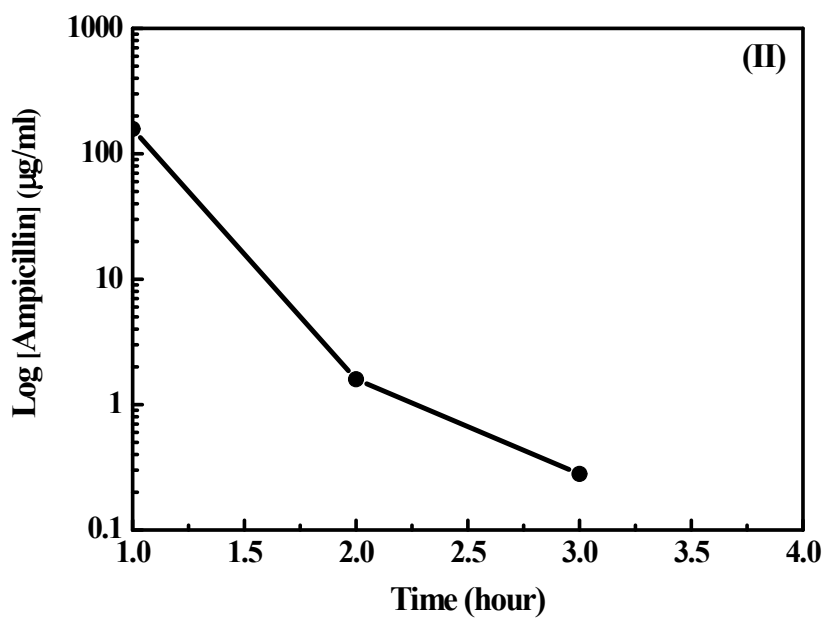

Figure S2 The release profiles of Ampicillin from (I) the PLA disk with and without the PLGA as the binder and (II) the PLA fiber in the buffer solution.

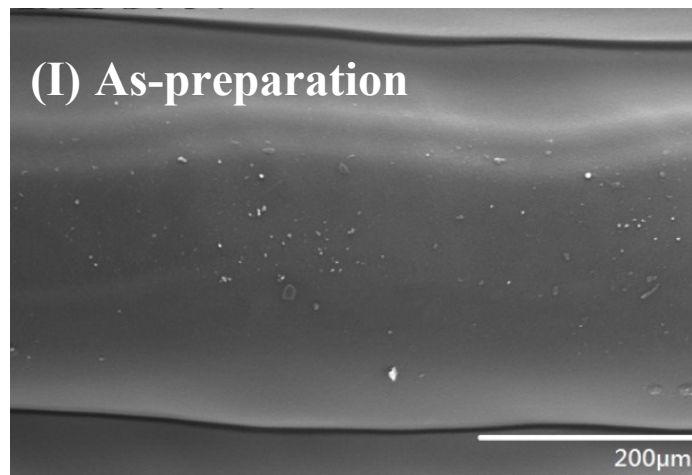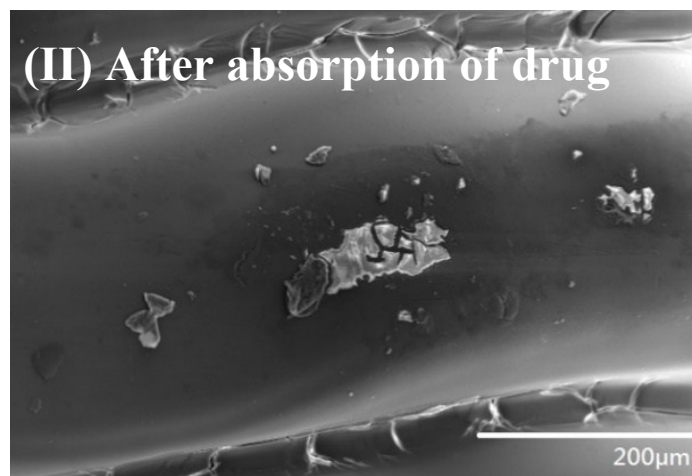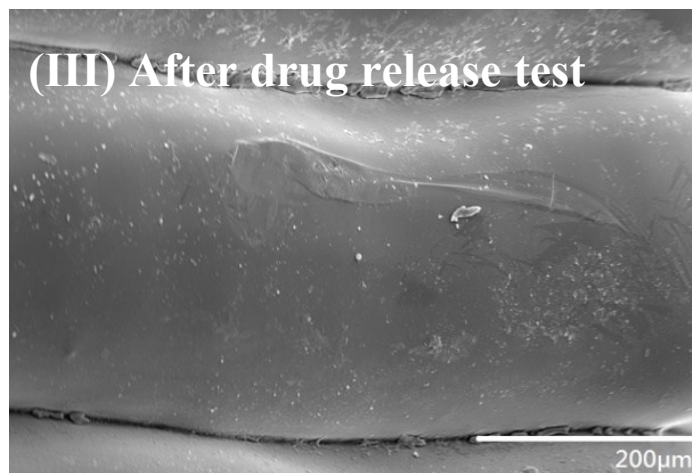

Figure S3 SEM images of the as preparation, after absorption of drug, and after drug release test for samples.

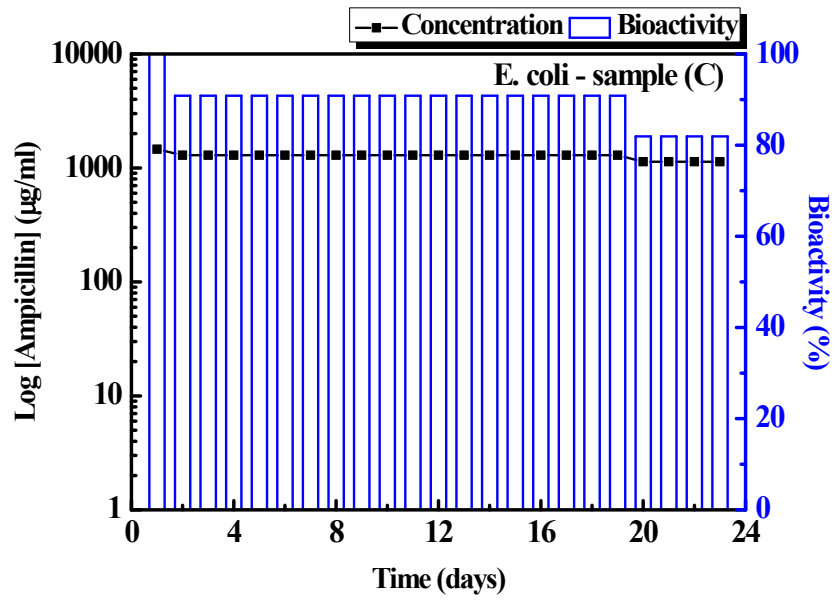

Figure S4 Bioactivity for *E. coli* using the release of Ampicillin from sample (C).
